# Supplementary material for: Uncovering the crystallography and formation mechanism of nanoscale clusters in Sb-rich SPPs of a p-type (Bi, Sb)2Te3 alloy
Source: Royal Society of Chemistry journal article supplement (doi:10.1039/d4cp01674b), 2024-01-01
Supplement: d4cp01674b1.pdf [file d4cp01674b1.pdf]

Title: Uncovering the crystallography and formation mechanism of nanoscale clusters in Sb-rich SPPs of a p-type (Bi, Sb)<sub>2</sub>Te<sub>3</sub> alloy

Jie Ren<sup>a,b,1</sup>, Qichen Wang<sup>a,b,1</sup>, Fuzhou Han<sup>a,b,\*</sup>, Wenbin Guo<sup>c</sup>, Yi Cao<sup>c</sup>, Songbin Li<sup>c</sup>,  
Geping Li<sup>a,b,\*</sup>, Muhammad Ali<sup>a,b</sup>, Jianan Hu<sup>a,b</sup>,

<sup>a</sup>School of Materials Science and Engineering, University of Science and Technology of China, 96 JinZhai Road, Baohe District, Hefei, Anhui 230026, People's Republic of China

<sup>b</sup>Institute of Metal Research, Chinese Academy of Sciences, 72 Wenhua Road, Shenyang 110016, People's Republic of China

<sup>c</sup>Jiangxi Copper Technology Research Academy Co., Ltd., Nanchang 330096, People's Republic of China

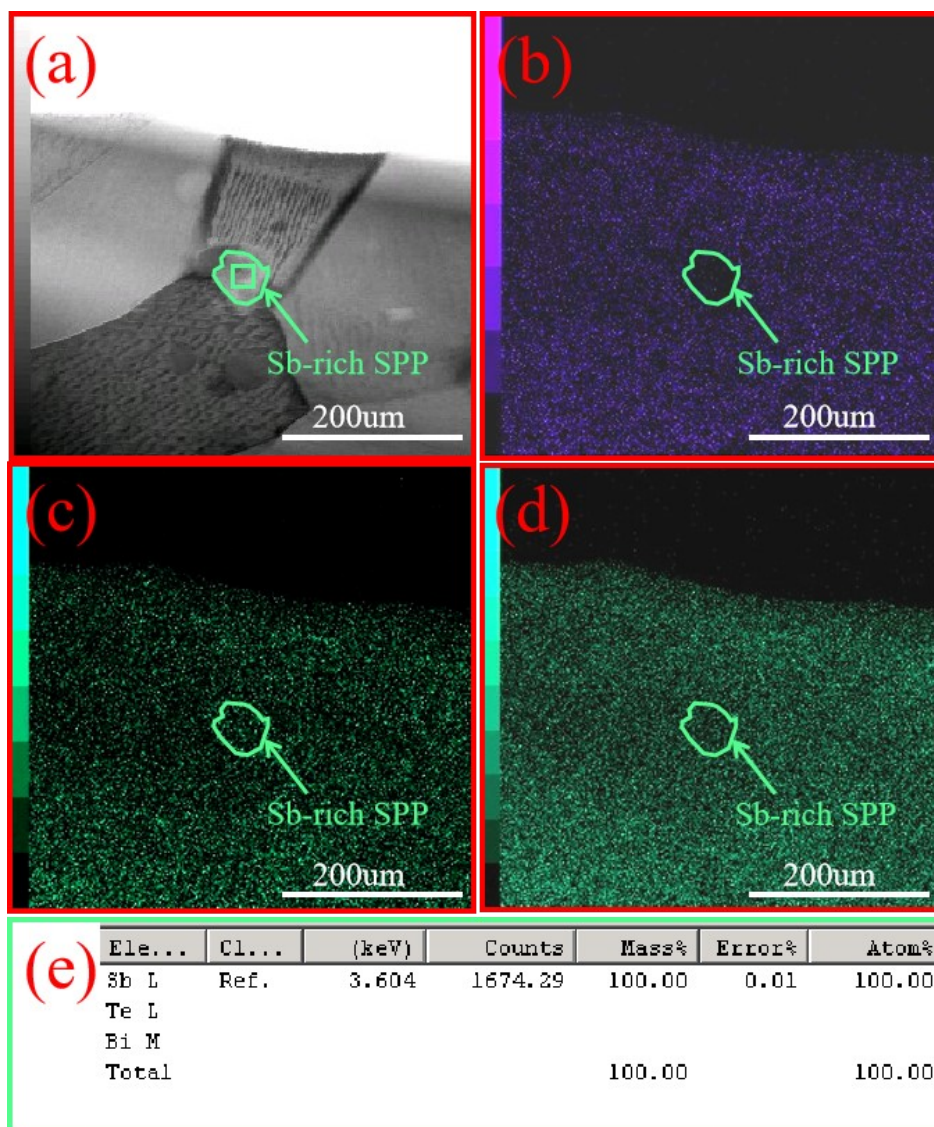

Fig. S1 The energy dispersive spectrometer (EDS) results of circular Sb-rich SPP.

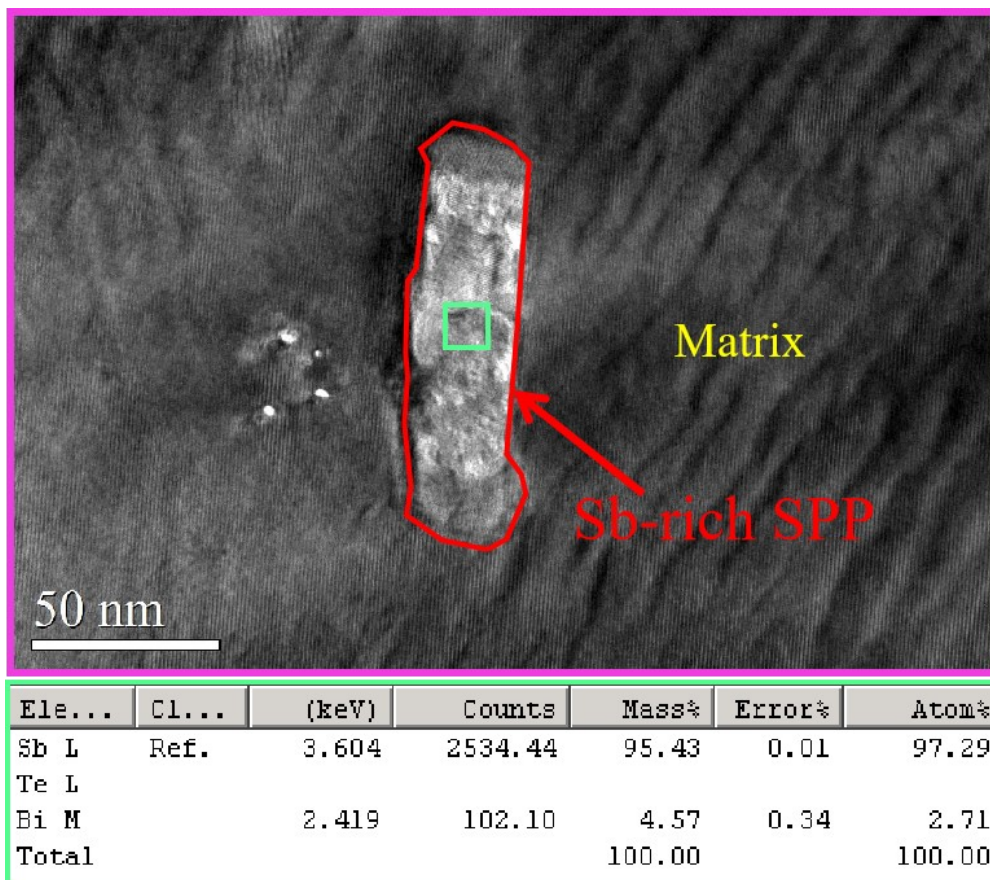

Fig. S2 The energy dispersive spectrometer (EDS) results of elongated Sb-rich SPP.
